# Supplementary material for: Evaluation of Si/carbon composite nanofiber-based insertion anodes for new-generation rechargeable lithium-ion batteries
Source: Royal Society of Chemistry journal article supplement (doi:10.1039/b912188a), 2009-11-28
Supplement: b912188a.pdf [file b912188a.pdf]

## **Supplementary Information**

# **Evaluation of Si/Carbon Composite Nanofiber-Based Insertion Anodes for New-Generation Rechargeable Lithium-Ion Batteries**

Liwen Ji and Xiangwu Zhang\*

*Fiber and Polymer Science Program, Department of Textile Engineering, Chemistry and  
Science, North Carolina State University, Raleigh, NC 27695-8301, USA*

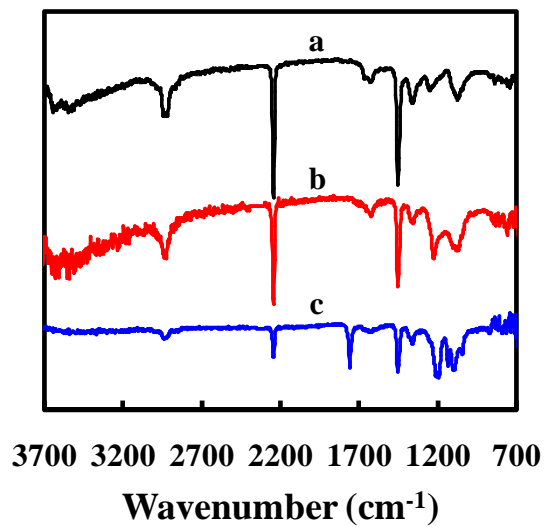

**Fig. S1** ATR-FTIR spectra of (a) pure PAN, (b) Si/PAN, and (c) Si/PAN/PLLA nanofibers.

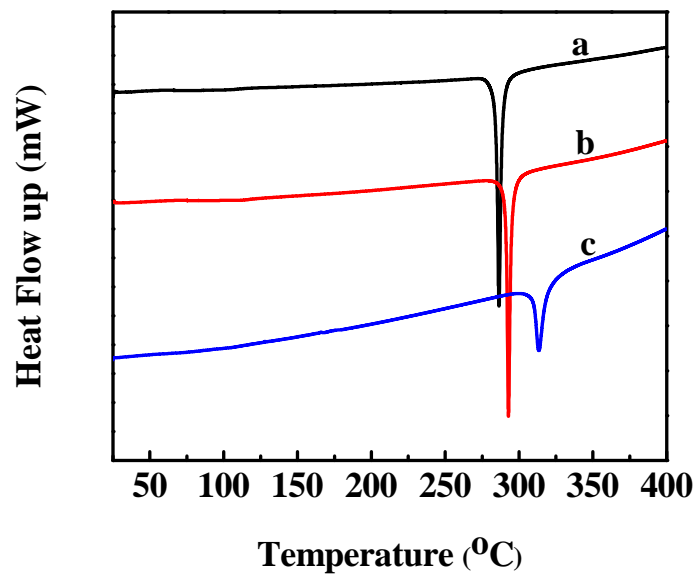

**Fig. S2** DSC thermograms of (a) pure PAN, (b) Si/PAN, and (c) Si/PAN/PLLA nanofibers

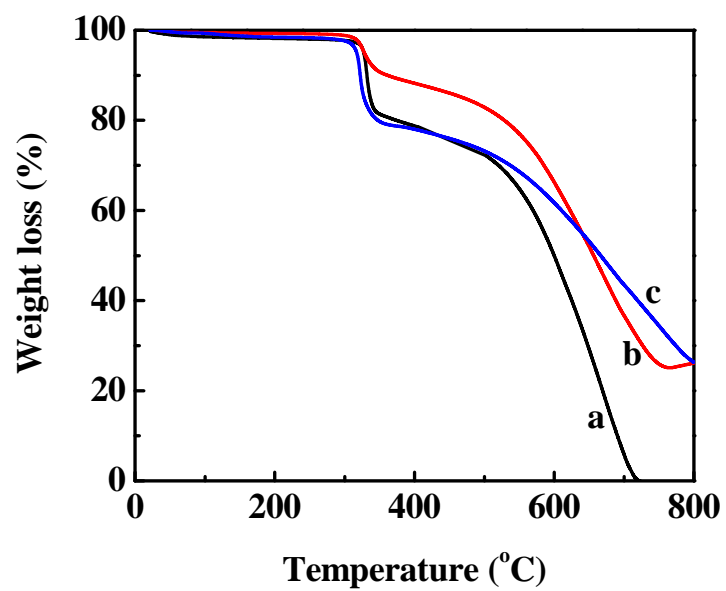

**Fig. S3** TGA thermograms of (a) pure PAN, (b) Si/PAN, and (c) Si/PAN/PLLA nanofibers.

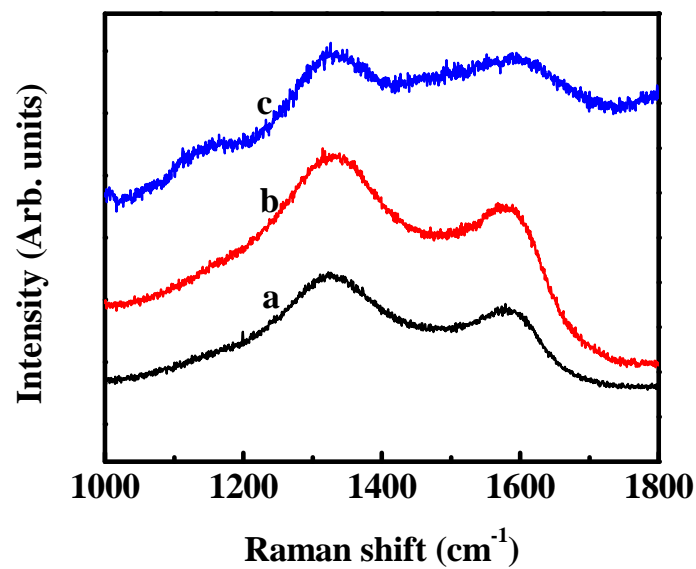

**Fig. S4** Raman spectra of (a) pure CNFs, (b) Si/CNFs (100/0), and (C) Si/CNFs (85/15).
